# Supplementary material for: Co-delivery of nigericin and decitabine using hexahistidine-metal nanocarriers for pyroptosis-induced immunotherapeutics
Source: PubMed Central journal article supplement — Acta Pharm Sin B. 2022 Nov 4;12(12):4458–71. doi: 10.1016/j.apsb.2022.11.002 (PMC9764131; doi:10.1016/j.apsb.2022.11.002), 2022-11-04
Supplement: mmc1.pdf [file mmc1.pdf]

## Supporting Information for

### ORIGINAL ARTICLE

# Co-delivery of nigericin and decitabine using hexahistidine-metal nanocarriers for pyroptosis-induced immunotherapeutics

**Qiang Niu<sup>a,†</sup>, Yu Liu<sup>b,†</sup>, Yujing Zheng<sup>b,†</sup>, Ziwei Tang<sup>a</sup>, Yuna Qian<sup>b,c</sup>, Ruogu Qi<sup>d,\*</sup>, Jianliang Shen<sup>b,c,\*</sup>, Ping Zhao<sup>a,\*</sup>**

<sup>a</sup>*School of Chemistry and Chemical Engineering, Guangdong Pharmaceutical University, Guangzhou 510006, China*

<sup>b</sup>*State Key Laboratory of Ophthalmology, Optometry and Vision Science, School of Ophthalmology and Optometry, School of Biomedical Engineering, Wenzhou Medical University, Wenzhou 325027, China*

<sup>c</sup>*Wenzhou Institute, University of Chinese Academy of Sciences, Wenzhou 325001, China*

<sup>d</sup>*School of Medicine & Holistic Integrative Medicine, Nanjing University of Chinese Medicine, Nanjing 210023, China*

Received 14 August 2022; received in revised form 10 October 2022; accepted 21 October 2022

<sup>†</sup>These authors made equal contributions to this work.

\*Corresponding authors.

E-mail addresses: rqi@njucm.edu.cn (Ruogu Qi), shenjl@wiucas.ac.cn (Jianliang Shen), pingzhao@gdpu.edu.cn (Ping Zhao).

|                                                                                                                       |    |
|-----------------------------------------------------------------------------------------------------------------------|----|
| <b>Fig. S1</b> Binding conformation and binding forces between Nig/His <sub>6</sub> and DAC/His <sub>6</sub> .....    | P3 |
| <b>Fig. S2</b> Dilution stability analysis and drug release of (Nig+DAC)@HmA .....                                    | P3 |
| <b>Fig. S3</b> Fluorescence images of MB49 cells incubated with Cy5.....                                              | P4 |
| <b>Fig. S4</b> Cell viability of MB49 cells treated by HmA .....                                                      | P4 |
| <b>Fig. S5</b> MB49 tumor growth curves of each mouse in different treat groups.....                                  | P5 |
| <b>Fig. S6</b> Body weight of MB49 tumor-bearing mice after different treatments.....                                 | P5 |
| <b>Fig. S7</b> 4T1 tumor growth curves of each mouse in different treatment groups.....                               | P6 |
| <b>Fig. S8</b> Body weight of 4T1 tumor-bearing mice after different treatments.....                                  | P6 |
| <b>Fig. S9</b> The gating strategy to sort macrophage (F4/80+) from 4T1 tumor-bearing mice presented in Fig. 7D. .... | P7 |

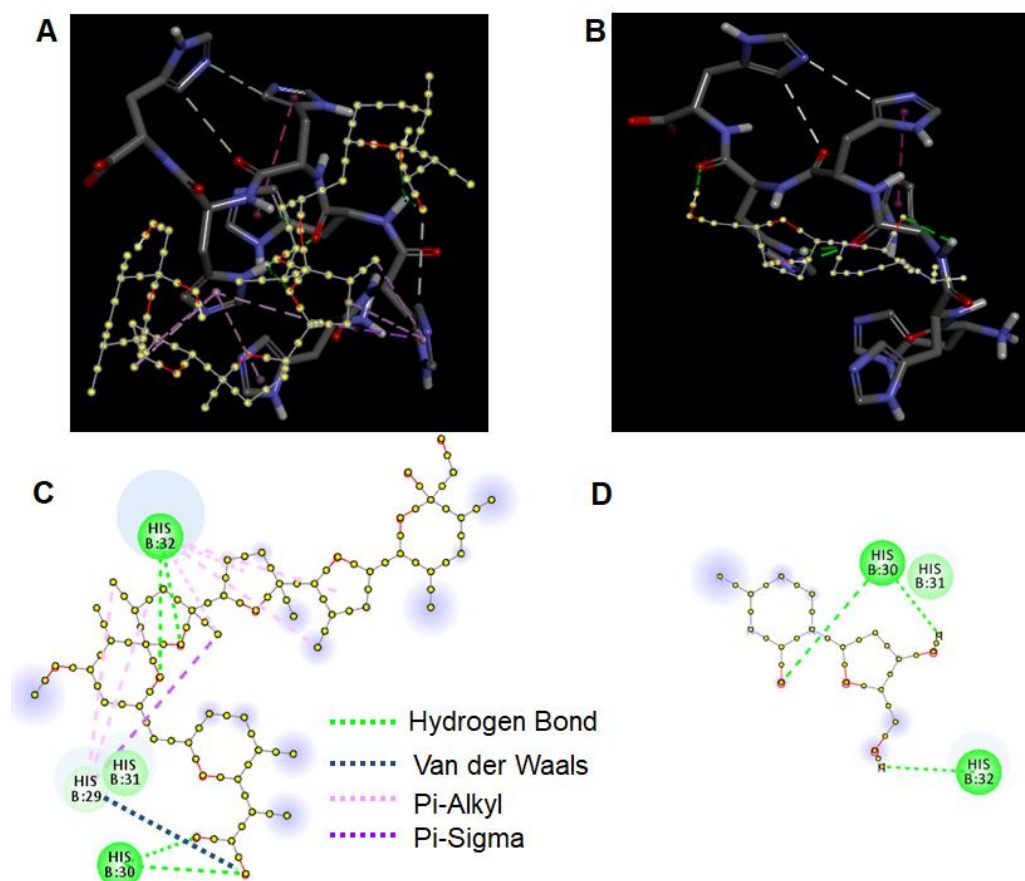

**Figure S1** The most stable binding conformation between Nig/His<sub>6</sub> (A) and DAC/His<sub>6</sub> (B). The binding forces between Nig/His<sub>6</sub> (C) and DAC/His<sub>6</sub> (D).

.....Hydrogen bond, .....Van der Waals, .....Pi-Alkyl, .....Pi-Sigma.

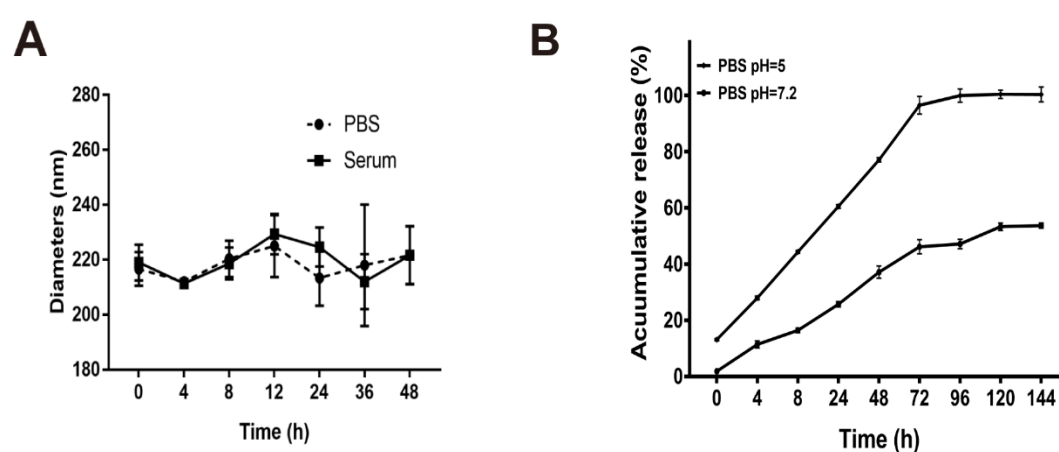

**Figure S2** (A) Dilution stability analysis of (Nig+DAC)@HmA in bovine serum albumin (BSA) and fetal bovine serum (FBS) buffer at room temperature. (B) Release of drug from (Nig+DAC)@HmA nanoparticles in PBS with pH 5.0 and

7.2.

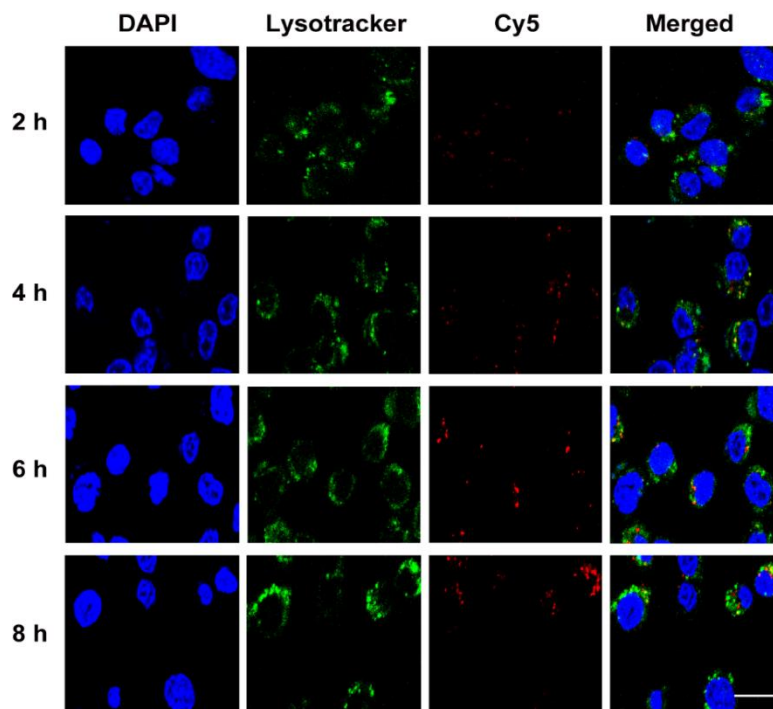

**Figure S3** Representative fluorescence images of MB49 cells incubated with Cy5 at different time points, scale bar = 20  $\mu\text{m}$ .

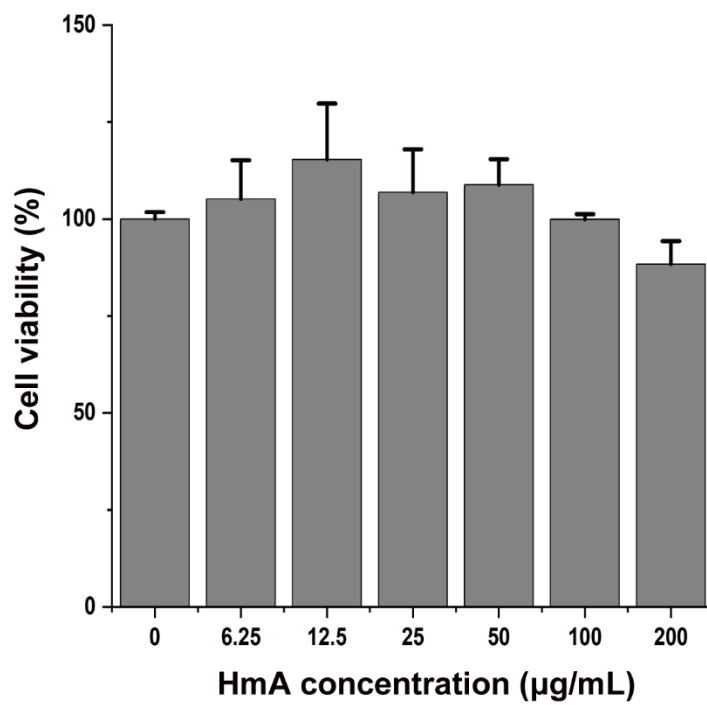

**Figure S4** Cell viability of MB49 cells was treated by HmA with different concentrations. Data are shown as mean  $\pm$  SD ( $n = 3$ ).

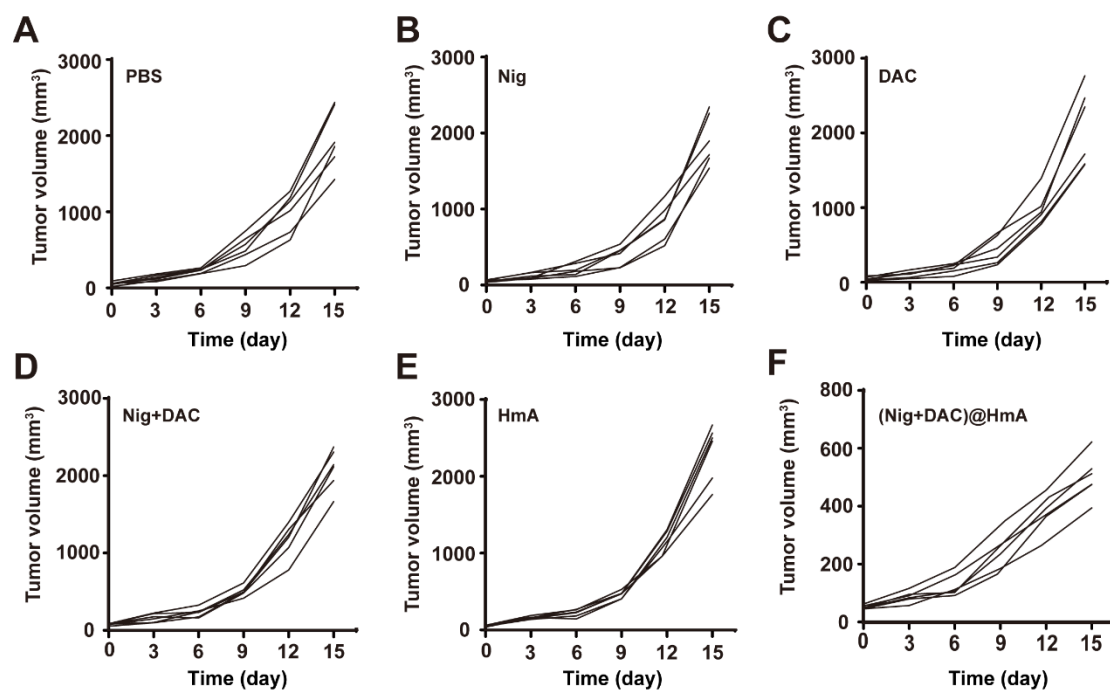

**Figure S5** MB49 tumor growth curves of each mouse in different treatment groups.

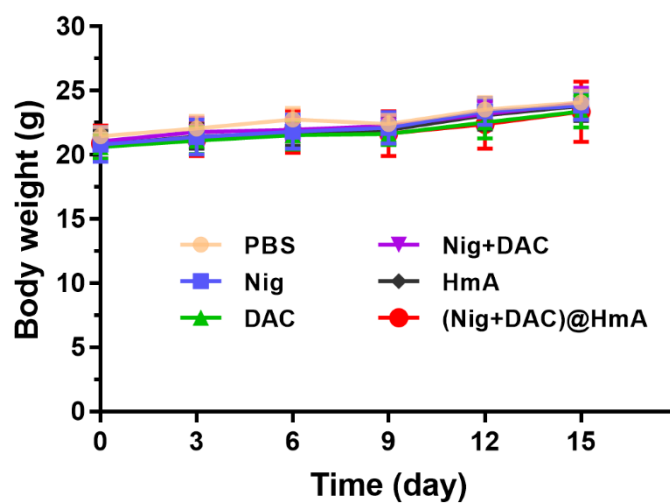

**Figure S6** Body weight of MB49 tumor-bearing mice after different treatments.

Data are shown as mean  $\pm$  SD ( $n = 4$ ).

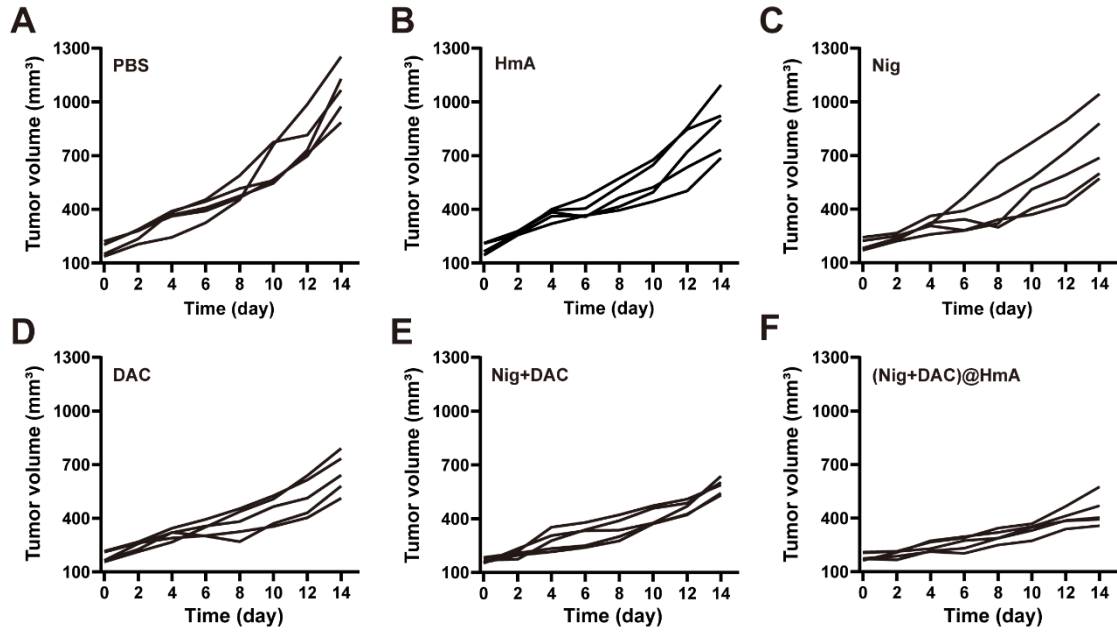

**Figure S7** 4T1 tumor growth curves of each mouse in different treatment groups.

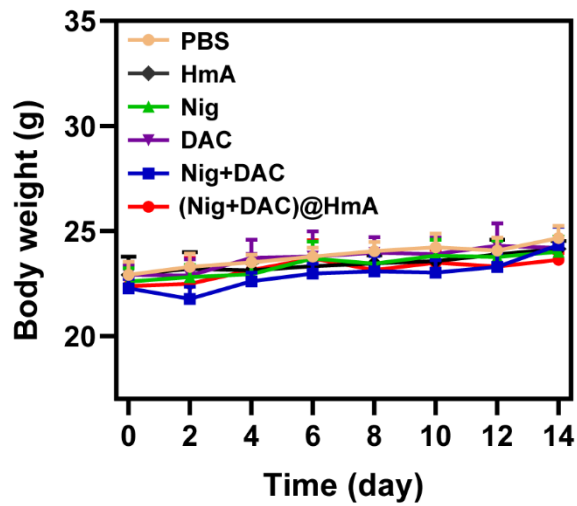

**Figure S8.** Body weight of 4T1 tumor-bearing mice after different treatments.

Data are shown as mean  $\pm$  SD ( $n = 5$ ).

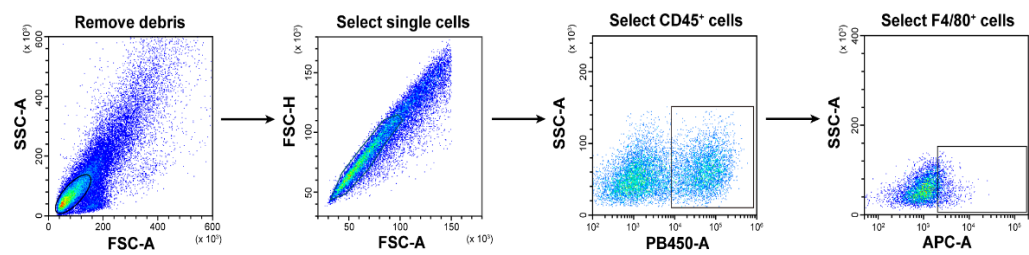

**Figure S9** The gating strategy to sort macrophage (F4/80<sup>+</sup>) from 4T1 tumor-bearing mice presented in Fig. 7D.
